# Supplementary material for: Identification and Spread of the Ghost Silverfish (Ctenolepisma calvum) among Museums and Homes in Europe
Source: MDPI journal article supplement (doi:10.3390/insects13090855), 2022-09-19
Supplement: s1 [file s1]

---

**Appendix S1** Description of the record in Poland

**Author of observation:** Michal Grabowski

**Observation date:** since 2014 until now – viable population in a sanitary installation of an apartment complex built in 2012

**Coordinates:** 51.73644705121365, 19.471731822502928

**Locality:** Łódź (Lodz), Poland

**Observation from iNaturalist:**

**Author of observation:** Monika Miturová

**Observation date:** 1 Nov 2021 · 09:13 CET

**Submitted to iNaturalist:** 1 Nov 2021 · 09:21 CET

**Coordinates:** 50.458141, 16.387447

**Accuracy:** 4.86km

**Locality:** Szczytna, Poland

Link: <https://www.inaturalist.org/observations/99959118> [43]
