# Supplementary material for: Identification and Spread of the Ghost Silverfish (Ctenolepisma calvum) among Museums and Homes in Europe
Source: MDPI journal article supplement (doi:10.3390/insects13090855), 2022-09-19
Supplement: s1 [file s1]

**Table S2** Records of the species *C. calvum* in different European countries, including also “negative” records (evaluation by experts of museum pests and Apterygota):

| Country          | Year of first record | Record / citation                                                                                                                                    |
|------------------|----------------------|------------------------------------------------------------------------------------------------------------------------------------------------------|
| Hungary          | 2003                 | Gábor Hegyessy 2021, published online<br><a href="https://www.izeltlabuak.hu/faj/szellemhalacska">https://www.izeltlabuak.hu/faj/szellemhalacska</a> |
| Germany          | 2007                 | Data by S. Erlacher 2017, published online<br><a href="http://www.chemnitz.de">www.chemnitz.de</a>                                                   |
| Austria          | 2010                 | Data by S. Erlacher, unpublished<br>2014 in a museum: Querner et al. 2017                                                                            |
| Tenerife (Spain) | 2012                 | <a href="#">inaturalist</a>                                                                                                                          |
| Poland           | 2014                 | First record in this paper Querner et al. 2022<br><a href="#">inaturalist</a>                                                                        |
| Finland          | 2017                 | Data by S. Erlacher, unpublished<br><a href="#">inaturalist</a>                                                                                      |
| Switzerland      | 2017                 | Data by S. Erlacher, unpublished<br>2019 in a museum: P. Querner, unpublished                                                                        |
| Norway           | 2018                 | Published: Aak et al. 2021<br>Also in data by S. Erlacher, unpublished                                                                               |
| Italy            | 2020                 | Data by S. Erlacher, unpublished                                                                                                                     |
| Russia           | 2020                 | <a href="#">inaturalist</a>                                                                                                                          |
| Luxembourg       | 2021                 | Data by S. Erlacher, unpublished                                                                                                                     |
| Croatia          | 2021                 | <a href="#">inaturalist</a>                                                                                                                          |
| Czech Republic   | 2021                 | Kulma et al. 2022                                                                                                                                    |
| Spain            | 2021                 | <a href="#">inaturalist</a>                                                                                                                          |
| Kosovo           | 2021                 | <a href="#">inaturalist</a>                                                                                                                          |

|               |      |                                                                                    |
|---------------|------|------------------------------------------------------------------------------------|
| Slovenia      | 2021 | <a href="#">inaturalist</a>                                                        |
| Ukraine       | 2021 | <a href="#">inaturalist</a>                                                        |
| Portugal      | 2021 | <a href="#">inaturalist</a>                                                        |
| Slovakia      | 2022 | <a href="#">inaturalist</a>                                                        |
| Sweden        | -    | Niklas Apelqvist (oral communication, 2022)                                        |
| Liechtenstein | -    | P. Querner, not found in museums<br>Peter Niederklopfen (oral communication, 2022) |
| Netherlands   | -    | Matty Berg (oral communication, 2022)                                              |
| France        | -    | Cyrille D' Haese (oral communication, 2022)                                        |
| Belgium       | -    | Koen Lock (oral communication, 2022)                                               |
| UK            | -    | David Pinniger (oral communication, 2022)                                          |
| Denmark       | -    | Anne-Kathrine Kjerulff (oral communication, 2022)                                  |
