# Supplementary material for: Identification and Spread of the Ghost Silverfish (Ctenolepisma calvum) among Museums and Homes in Europe
Source: MDPI journal article supplement (doi:10.3390/insects13090855), 2022-09-19
Supplement: s1 [file s1]

**Table S4** Taxonomic and morphological species characters for Central Europe reported species:

| Name                         | Shape of urotergite X      | combs on urotergites                                                                                      | Combs on urosternites                                                                  | Number of styli | Colour of scales                                                                                       | Tufts of feathered bristles at frontal part of head | Leg pigmentation                                                                                                       | Length of abdominal appendages                                                            | Ovipositor                                                 |
|------------------------------|----------------------------|-----------------------------------------------------------------------------------------------------------|----------------------------------------------------------------------------------------|-----------------|--------------------------------------------------------------------------------------------------------|-----------------------------------------------------|------------------------------------------------------------------------------------------------------------------------|-------------------------------------------------------------------------------------------|------------------------------------------------------------|
| <i>Lepisma saccharinum</i>   | Lengthy (longer than wide) | No combs                                                                                                  | No combs                                                                               | 2               | at dorsal side uniformly grey, ventral side light                                                      | absent                                              | absent                                                                                                                 | cerci/ body: <0.5<br>Cerci point obliquely backwards<br><br>terminal filament/ body: <0.5 |                                                            |
| <i>Thermobia domestica</i>   | broad subtriangular        | I: 1+1<br>II: 2+2<br>III: 2+2<br>IV: 2+2<br>V: 2+2<br>VI: 2+2<br>VII: 2+2<br>VIII: 2+2<br>IX: 0<br>X: 1+1 | I: 0<br>II: 0<br>III: 1<br>IV: 1+1+1<br>V: 1+1+1<br>VI: 1+1+1<br>VII: 1+1<br>VIII: 1+1 | 3(f) 3(m)       | dark and light grey mixed with brown (body patterned in horizontal stripes of different scale colours) | present                                             | nearly absent to absent (tibiae distally with slightly pigmented ring, tarsus 1 likewise with slightly pigmented ring) | cerci/ body:<br>(f) 0.8<br>(m) 0.9<br><br>terminal filament/ body:<br>(f) 1.0<br>(m) 0.8  | Slender, 1-2 times length of styli IX                      |
| <i>Ctenolepisma calvum</i>   | trapezoidal                | I: 1+1<br>II: 3+3<br>III: 3+3<br>IV: 3+3<br>V: 3+3<br>VI: 2+2<br>VII: 2+2<br>VIII: 2+2<br>IX: 0<br>X: 1+1 | I: 0<br>II: 0<br>III: 1+1<br>IV: 1+1<br>V: 1+1<br>VI: 1+1<br>VII: 1+1<br>VIII: 1+1     | 1(f) 1(m)       | at dorsal side whitish to yellowish                                                                    | present                                             | absent                                                                                                                 | cerci/ body:<br>~0.66<br><br>terminal filament/ body:<br>~1.0                             | slightly surpasses styli IX                                |
| <i>Ctenolepisma lineatum</i> | broad subtriangular        | I: 1+1<br>II: 3+3<br>III: 3+3<br>IV: 3+3<br>V: 3+3<br>VI: 3+3<br>VII: 3+3<br>VIII: 2+2<br>IX: 0<br>X: 1+1 | I: 0<br>II: 0<br>III: 1+1<br>IV: 1+1<br>V: 1+1<br>VI: 1+1<br>VII: 1+1<br>VIII: 1+1     | 3(f) 3(m)       | at dorsal side greyish and light brown (the light brownish scales form longitudinal stripes)           | present                                             | present moderately to strong                                                                                           | cerci/ body: ~1.0<br><br>terminal filament/ body: ~1.0                                    | long, with 47–52 divisions, 0.9–2 times length of styli IX |

|                                   |             |                                                                                                           |                                                                                    |           |                                                                          |         |                                                                                            |                                                                         |                                                          |
|-----------------------------------|-------------|-----------------------------------------------------------------------------------------------------------|------------------------------------------------------------------------------------|-----------|--------------------------------------------------------------------------|---------|--------------------------------------------------------------------------------------------|-------------------------------------------------------------------------|----------------------------------------------------------|
| <i>Ctenolepisma longicaudatum</i> | trapezoidal | I: 1+1<br>II: 3+3<br>III: 3+3<br>IV: 3+3<br>V: 3+3<br>VI: 3+3<br>VII: 2+2<br>VIII: 2+2<br>IX: 0<br>X: 1+1 | I: 0<br>II: 0<br>III: 1+1<br>IV: 1+1<br>V: 1+1<br>VI: 1+1<br>VII: 1+1<br>VIII: 1+1 | 2(f) 2(m) | at dorsal side uniformly grey, seldom silverish to whitish               | present | absent                                                                                     | cerci/ body: ~0.8<br><br>terminal filament/ body: ~1.0                  | long, 2 times length of styli IX                         |
| <i>Ctenolepisma targionium</i>    | trapezoidal | I: 2+2<br>II: 3+3<br>III: 3+3<br>IV: 3+3<br>V: 3+3<br>VI: 2+2<br>VII: 2+2<br>VIII: 1+1<br>IX: 0<br>X: 1+1 |                                                                                    | 2(f) 1(m) | at dorsal side uniformly light grey, at ventral side whitish             | present | absent (yellowish white to white)                                                          | cerci/ body: ~0.66<br><br>terminal filament/ body: ~0.66                |                                                          |
| <i>Ctenolepisma ciliatum</i>      | trapezoidal | I: 1+1<br>II: 3+3<br>III: 3+3<br>IV: 3+3<br>V: 3+3<br>VI: 3+3<br>VII: 2+2<br>VIII: 2+2<br>IX: 0<br>X: 1+1 | I: 0<br>II: 0<br>III: 1+1<br>IV: 1+1<br>V: 1+1<br>VI: 1+1<br>VII: 1+1<br>VIII: 1+1 | 2(f) 2(m) | on dorsal side uniformly brown to greyish brown; ventral side lighter    | present | epidermic pigment more or less dark, but always distinct, usually very intense on the legs | terminal filament shorter than body length, cerci shorter than filament | short to relatively long, 1–1.5 times length of styli IX |
| <i>Ctenolepisma rothschildi</i>   | trapezoidal | I: 1+1<br>II: 3+3<br>III: 3+3<br>IV: 3+3<br>V: 3+3<br>VI: 2+2<br>VII: 2+2<br>VIII: 2+2<br>IX: 0<br>X: 1+1 | I: 0<br>II: 0<br>III: 1+1<br>IV: 1+1<br>V: 1+1<br>VI: 1+1<br>VII: 1+1<br>VIII: 1+1 | 2(f) 2(m) | on dorsal side uniformly very dark; ventral side light grey/straw colour | present | without much pigment, but pigmented                                                        | cerci/ body: 0.6<br><br>terminal filament/ body: 0.6                    | thin, very long                                          |
