# Supplementary material for: Identification and Spread of the Ghost Silverfish (Ctenolepisma calvum) among Museums and Homes in Europe
Source: MDPI journal article supplement (doi:10.3390/insects13090855), 2022-09-19
Supplement: s1 [file s1]

Table S1. List of specimens used for the DNA barcoding and the Neighbour-Joining tree construction.

| Species - IDs from BOLD           | Project Code | Process ID  | Sample ID      | BIN          | GenBank accession number | Locality                    | Lat      | Lon     | Sequence origin    |
|-----------------------------------|--------------|-------------|----------------|--------------|--------------------------|-----------------------------|----------|---------|--------------------|
| <i>Ctenolepisma longicaudatum</i> | ZYI          | ZYI065-18   | gbs001836      | BOLD:AEE2038 | -                        | Hobart, Tasmania, Australia | -42.5872 | 147.306 | Graeme et al. 2019 |
| Zygentoma                         | GBZYG        | GBEPT734-14 | GBOL04158      | BOLD:ACA5333 | -                        | Chemnitz, Germany           | 50.834   | 12.926  | BOLD               |
| Zygentoma                         | GBZYG        | GBEPT732-14 | GBOL04156      | BOLD:ACA5333 | -                        | Chemnitz, Germany           | 50.834   | 12.926  | BOLD               |
| Zygentoma                         | GBZYG        | GBEPT729-14 | GBOL04153      | BOLD:ACA5333 | -                        | Chemnitz, Germany           | 50.834   | 12.926  | BOLD               |
| Zygentoma                         | GBZYG        | GBEPT728-14 | GBOL04152      | BOLD:ACA5333 | -                        | Chemnitz, Germany           | 50.834   | 12.926  | BOLD               |
| <i>Lepisma saccharinum</i>        | PLLEP        | PLLEP011-21 | Ajaz_Lepisma_2 | BOLD:ACB9678 | OP028709                 | Kalonka, Poland             | 51.8285  | 19.574  | This study         |
| <i>Lepisma saccharinum</i>        | PLLEP        | PLLEP010-21 | AJaz_Lepisma_1 | BOLD:ACB9678 | OP028707                 | Kalonka, Poland             | 51.8285  | 19.574  | This study         |

|                            |       |             |                   |              |          |              |         |         |            |
|----------------------------|-------|-------------|-------------------|--------------|----------|--------------|---------|---------|------------|
| <i>Lepisma saccharinum</i> | PLLEP | PLLEP005-21 | KBS_Lepisma_2     | BOLD:ACB9678 | OP028706 | Lodz, Poland | 51.7745 | 19.4766 | This study |
| <i>Lepisma saccharinum</i> | PLLEP | PLLEP004-21 | TR_Lepisma_2      | BOLD:ACB9678 | OP028705 | Lodz, Poland | 51.7767 | 19.5305 | This study |
| <i>Ctenolepisma calvum</i> | PLLEP | PLLEP009-21 | MG_Ctenolepisma_3 | BOLD:ACA5333 | OP028701 | Lodz, Poland | 51.7372 | 19.4721 | This study |
| <i>Ctenolepisma calvum</i> | PLLEP | PLLEP008-21 | MG_Ctenolepisma_2 | BOLD:ACA5333 | OP028703 | Lodz, Poland | 51.7372 | 19.4721 | This study |
| <i>Ctenolepisma calvum</i> | PLLEP | PLLEP007-21 | MG_Ctenolepisma_1 | BOLD:ACA5333 | OP028702 | Lodz, Poland | 51.7372 | 19.4721 | This study |
| <i>Lepisma saccharinum</i> | PLLEP | PLLEP006-21 | MG_mom_Lepisma_1  | BOLD:ACB9678 | OP028708 | Lodz, Poland | 51.7359 | 19.4716 | This study |
| <i>Lepisma saccharinum</i> | PLLEP | PLLEP001-21 | Ajab_Lepisma_1    | BOLD:ACB9678 | OP028710 | Lodz, Poland | 51.8014 | 19.4706 | This study |
| <i>Lepisma saccharinum</i> | PLLEP | PLLEP003-21 | KBS_Lepisma_1     | BOLD:ACB9678 | OP028704 | Lodz, Poland | 51.7745 | 19.4766 | This study |
| <i>Lepisma saccharinum</i> | PLLEP | PLLEP002-21 | TR_Lepisma_1      | BOLD:ACB9678 | OP028711 | Lodz, Poland | 51.7767 | 19.5305 | This study |
